# Supplementary material for: The Role of Diet in the Cardiovascular Health of Childhood Cancer Survivors—A Systematic Review
Source: MDPI journal article supplement (doi:10.3390/nu16091315), 2024-04-27
Supplement: s1 [file s1]

**S4 File. Certainty of evidence based on Grading of Recommendations, Assessment, Development and Evaluation (GRADE).**

|                                   | Outcome                                       | Risk of Bias | Imprecision | Inconsistency | Indirectness | Publication Bias | Overall |
|-----------------------------------|-----------------------------------------------|--------------|-------------|---------------|--------------|------------------|---------|
| <b>Obesity indicators</b>         | BMI                                           | -1           | 0           | -1            | 0            | 0                | ⊕⊕      |
|                                   | Waist circumference                           | -1           | 0           | -1            | 0            | 0                | ⊕⊕      |
|                                   | Percent body fat                              | -1           | -1          | 0             | 0            | -1               | ⊕       |
|                                   | Visceral adiposity and subcutaneous adiposity | -1           | -1          | 0             | 0            | -1               | ⊕       |
|                                   | Obesity <sup>a</sup>                          | -1           | -1          | 0             | 0            | 0                | ⊕⊕      |
| <b>Diabetes indicators</b>        | HOMA-IR                                       | -1           | 0           | -1            | 0            | 0                | ⊕⊕      |
|                                   | Glucose                                       | -1           | 0           | -1            | 0            | 0                | ⊕⊕      |
|                                   | Insulin                                       | -1           | -1          | 0             | 0            | -1               | ⊕       |
|                                   | Insulin resistance <sup>b</sup>               | -1           | -1          | 0             | 0            | 0                | ⊕⊕      |
| <b>Hypertension indicators</b>    | Blood pressure                                | -1           | 0           | -1            | 0            | 0                | ⊕⊕      |
|                                   | Hypertension <sup>c</sup>                     | -1           | -1          | 0             | 0            | 0                | ⊕⊕      |
| <b>Dyslipidaemia indicators</b>   | HDL-C                                         | -1           | 0           | -1            | 0            | 0                | ⊕⊕      |
|                                   | LDL-C                                         | -1           | -1          | 0             | 0            | 0                | ⊕       |
|                                   | Triglycerides                                 | -1           | 0           | -1            | 0            | 0                | ⊕⊕      |
|                                   | Dyslipidaemia <sup>d</sup>                    | -1           | -1          | 0             | 0            | 0                | ⊕⊕      |
| <b>2 or more CVD risk factors</b> | Presence of 2 or more CVD risk factors        | -1           | 0           | 0             | 0            | 0                | ⊕⊕⊕     |

Metabolic syndrome <sup>e</sup>

-1

0

0

0

0

⊕⊕⊕

Abbreviations: BMI: body mass index; HDL-C: high-density lipoprotein-cholesterol; HOMA-IR: homeostatic model assessment – insulin resistance; LDL-C: low-density lipoprotein-cholesterol.

Certainty of Evidence classified as either “very low”, “low”, “moderate”, or “high”. The certainty could be downgraded due to a high risk of bias, inconsistency (unexplained heterogeneity), indirectness (lack of generalisability or external validity), imprecision (small sample size or wide confidence intervals), or the presence of publication bias.

⊕ = very low, ⊕⊕ = low, ⊕⊕⊕ = moderate, ⊕⊕⊕⊕ = high.

<sup>a</sup> Obesity was defined as having at least one of: BMI  $\geq 30\text{kg/m}^2$  in adults and  $\geq 97^{\text{th}}$  percentile in children, waist circumference  $\geq 102\text{cm}$  in men,  $\geq 88\text{cm}$  in women and  $\geq 95^{\text{th}}$  percentile in children.

<sup>b</sup> Insulin resistance was defined as having at least one of: blood fasting glucose  $\geq 6.1\text{ mmol/L}$  (109.8 mg/dL), glycated haemoglobin  $\geq 6\%$  and  $< 6.5\%$  and homeostasis model assessment-insulin resistance  $\geq 2.86$  in adults and  $\geq 95^{\text{th}}$  percentile in children.

<sup>c</sup> Hypertension were defined, respectively, as: blood pressure  $\geq 130/85$  and  $< 140/90\text{ mmHg}$  in adults and  $\geq 90^{\text{th}}$  and  $< 95^{\text{th}}$  percentile for age and height in children and  $\geq 140/90\text{ mmHg}$  or taking medication in adults and  $\geq 95^{\text{th}}$  percentile for age and height or taking medication in children.

<sup>d</sup> Dyslipidaemia was defined as having at least one of: triglycerides  $\geq 1.7\text{ mmol/L}$  (150.6 mg/dL) in adults and  $\geq 1.47\text{ mmol/L}$  (130.2 mg/dL) in children, LDL-C  $\geq 3.4\text{ mmol/L}$  (131.5 mg/dL) in adults and  $\geq 3.36\text{ mmol/L}$  (129.9 mg/dL) in children, HDL-C  $< 1.03$  in men (39.8 mg/dL), and  $< 1.3\text{ mmol/L}$  (50.3 mg/dL) in women and  $< 1.03\text{ mmol/L}$  (39.8 mg/dL) in children.

<sup>e</sup> Metabolic syndrome was defined as three or more of the following: 1) abdominal obesity (waist circumference of  $> 102\text{ cm}$  in males or  $> 88\text{ cm}$  in females); 2) triglycerides  $\geq 150\text{ mg/dL}$ ; 3) high-density lipoprotein (HDL) cholesterol  $< 40\text{ mg/dL}$  in males or  $< 50\text{ mg/dL}$  in females; 4) hypertension (systolic pressure  $\geq 130\text{ mm Hg}$  or diastolic pressure  $\geq 85\text{ mm Hg}$ ); and 5) fasting plasma glucose  $\geq 100\text{ mg/dL}$ , consistently across the studies.
