# Supplementary material for: The Role of Diet in the Cardiovascular Health of Childhood Cancer Survivors—A Systematic Review
Source: Nutrients. 2024 Apr 27;16(9):1315. doi: 10.3390/nu16091315 (PMC11085214; doi:10.3390/nu16091315)
Supplement: Supplementary file 1 [file nutrients-16-01315-s001.zip]

Archive with 4 entries (4 files):
- S1 PRISMA checklist.pdf
- S2 File - JBI Checklist Cross-Sectional Studies.pdf
- S3 File - JBI Checklist Quasi-Experimental studies.pdf
- S4 File - GRADE.pdf
